# Supplementary material for: Rapidly increasing SARS-CoV-2 seroprevalence and limited clinical disease in three Malian communities: a prospective cohort study
Source: PubMed Central journal article supplement (PMC8095226; doi:10.1101/2021.04.26.21256016), 2021-04-29
Supplement: media-1.pdf [file media-1.pdf]

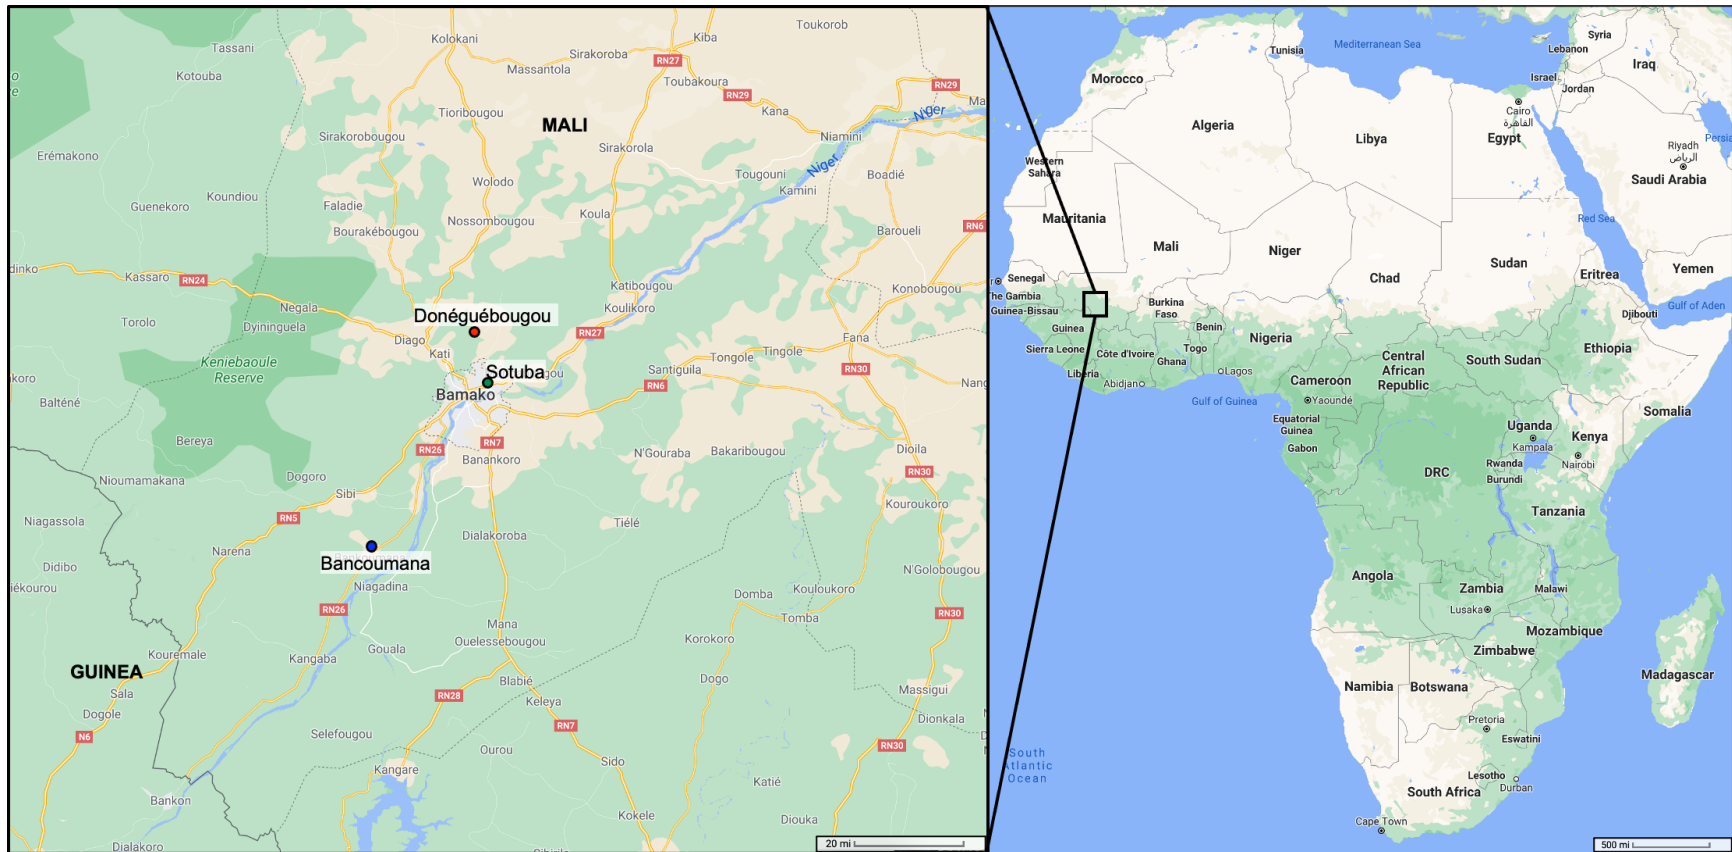

**Supplementary Figure 1: Map of study sites**  
 Adapted from Google Maps

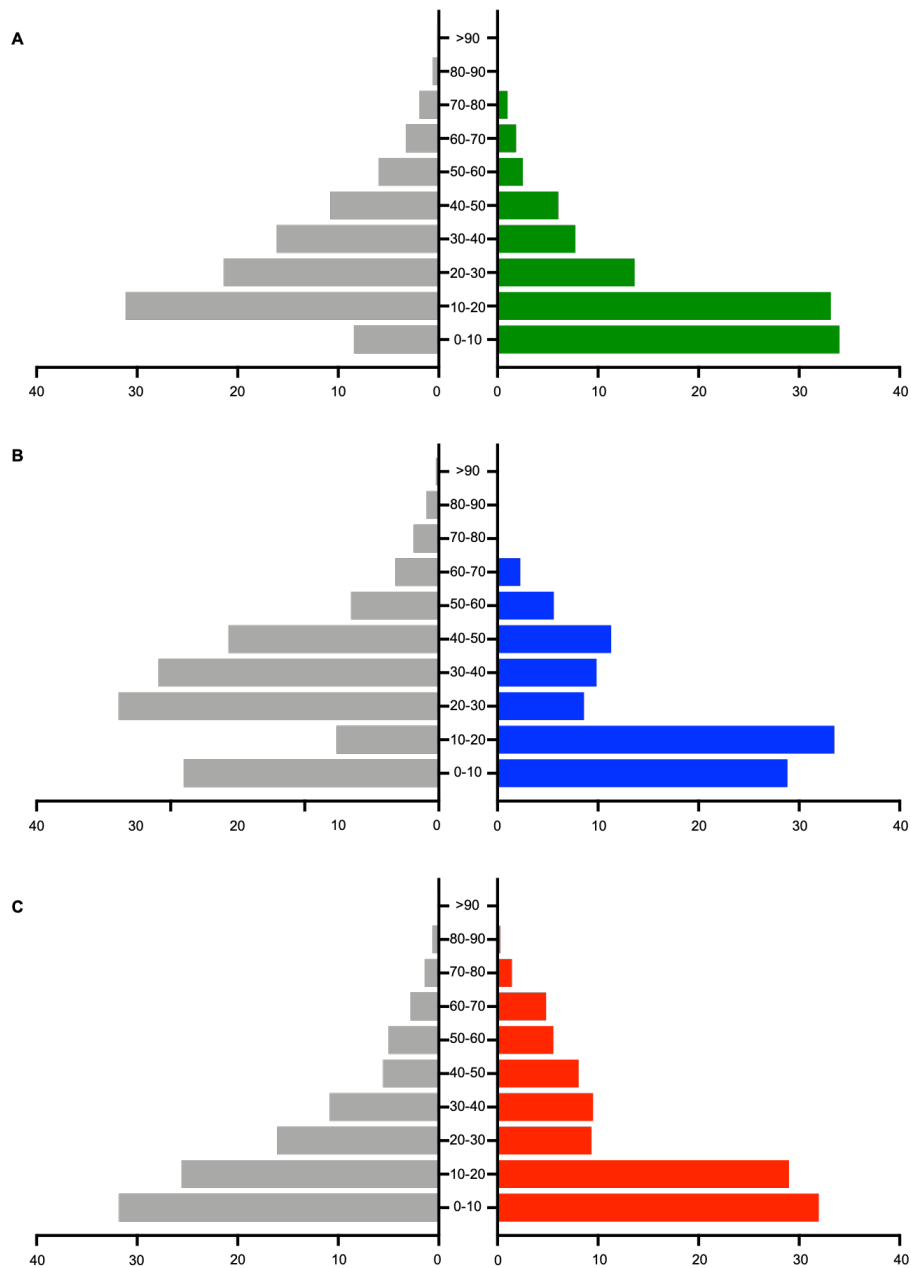

**Supplementary Figure 2: Age structure of A) Sotuba (urban), B) Bancoumana (rural), and C) Donéguébougou (rural). Age group in years (y-axis) versus percentage of overall population (x-axis).**

Grey histograms represent census data for each study site.

Colored histograms represent sample for each study site.

**Supplementary Table 1: Seroprevalence of SARS-CoV-2 antibodies at visit 1 and visit 2 at Sotuba (urban), Bancoumana (rural town) and Donéguébougou (rural) sites.**

| Site                              | Dates of sample collection             | Crude seropositivity rate<br>(95% CI) | Adjusted seropositivity rate<br>(95% CI) <sup>1</sup> |
|-----------------------------------|----------------------------------------|---------------------------------------|-------------------------------------------------------|
| Sotuba (visit 1)<br>N=587         | 29 July to 16 October 2020             | 13.1%<br>(10.4-15.9)                  | 19.0%<br>(14.2-23.8)                                  |
| Sotuba (visit 2)<br>N=528         | 21 December 2020 to 26<br>January 2021 | 44.9%<br>(40.7-49.1)                  | 70.4%<br>(56.8-84.1)                                  |
| Bancoumana (visit 1)<br>N=963     | 29 July to 24 September 2020           | 5.3%<br>(3.9-6.7)                     | 6.5%<br>(4.1-9.0)                                     |
| Bancoumana (visit 2)<br>N=904     | 28 December 2020 to 29<br>January 2021 | 35.5%<br>(32.4-38.6)                  | 52.1%<br>(41.9-62.3)                                  |
| Donéguébougou (visit 1)<br>N=1109 | 28 July to 27 August 2020              | 4.1%<br>(2.9-5.2)                     | 5.0%<br>(2.8-7.1)                                     |
| Donéguébougou (visit 2)<br>N=1088 | 14 December 2020 to 15<br>January 2021 | 25.8%<br>(23.2-28.4)                  | 35.0%<br>(27.9-42.1)                                  |

<sup>1</sup>Adjusted for population age distribution and assay sensitivity and specificity [1].

- Lang, Z. and J. Reiczigel, *Confidence limits for prevalence of disease adjusted for estimated sensitivity and specificity*. Prev Vet Med, 2014. **113**(1): p. 13-22.

**Supplementary Table 2: Age-stratified seroprevalence of SARS-CoV-2 antibodies at visit 1 and visit 2 at Sotuba (urban), Bancoumana (rural town) and Donéguébougou (rural) sites.**

| Site                              | Dates of sample collection             | Crude seropositivity rate (95% CI) |                      |                      | Adjusted seropositivity rate (95% CI) <sup>1</sup> |                      |                      |
|-----------------------------------|----------------------------------------|------------------------------------|----------------------|----------------------|----------------------------------------------------|----------------------|----------------------|
|                                   |                                        | <10 years                          | 10-17 years          | ≥18 years            | <10 years                                          | 10-17 years          | ≥18 years            |
| Sotuba (visit 1)<br>N=587         | 29 July to 16 October 2020             | 10.7%<br>(6.3-15.1)                | 11.7%<br>(6.6-16.7)  | 16.2%<br>(11.4-21.0) | 13.8%<br>(8.4-19.2)                                | 15.1%<br>(9.0-21.1)  | 21.3%<br>(14.8-27.8) |
| Sotuba (visit 2)<br>N=528         | 21 December 2020 to 26<br>January 2021 | 29.1%<br>(22.4-35.7)               | 47.3%<br>(39.4-55.2) | 57.2%<br>(50.4-64.0) | 38.8%<br>(28.9-48.7)                               | 63.7%<br>(49.5-77.9) | 77.2%<br>(61.5-92.9) |
| Bancoumana (visit 1)<br>N=963     | 29 July to 24 September 2020           | 4.0%<br>(1.5-6.4)                  | 6.0%<br>(3.1-8.8)    | 5.7%<br>(3.4-8.1)    | 4.6%<br>(1.6-7.6)                                  | 7.3%<br>(3.8-10.9)   | 7.0%<br>(3.9-10.1)   |
| Bancoumana (visit 2)<br>N=904     | 28 December 2020 to 29<br>January 2021 | 24.2%<br>(19.1-29.4)               | 36.6%<br>(30.8-42.4) | 42.6%<br>(37.6-47.6) | 32.3%<br>(24.2-40.3)                               | 49.2%<br>(38.3-60.0) | 57.3%<br>(45.6-69.0) |
| Donéguébougou (visit 1)<br>N=1109 | 28 July to 27 August 2020              | 3.1%<br>(1.2-5.1)                  | 1.7%<br>(0.0-3.5%)   | 6.2%<br>(4.0-8.5)    | 3.4%<br>(0.9-6.0%)                                 | 1.5%<br>(0-3.9)      | 7.7%<br>(4.6-10.8)   |
| Donéguébougou (visit 2)<br>N=1088 | 14 December 2020 to 15<br>January 2021 | 12.2%<br>(8.8-15.7)                | 28.5%<br>(23.2-33.7) | 34.7%<br>(30.4-39.1) | 15.8%<br>(11.0-20.7)                               | 41.0%<br>(31.5-50.5) | 46.6%<br>(36.8-56.3) |

<sup>1</sup>Adjusted for assay sensitivity and specificity [1].

1. Lang, Z. and J. Reiczigel, *Confidence limits for prevalence of disease adjusted for estimated sensitivity and specificity*. *Prev Vet Med*, 2014. **113**(1): p. 13-22.

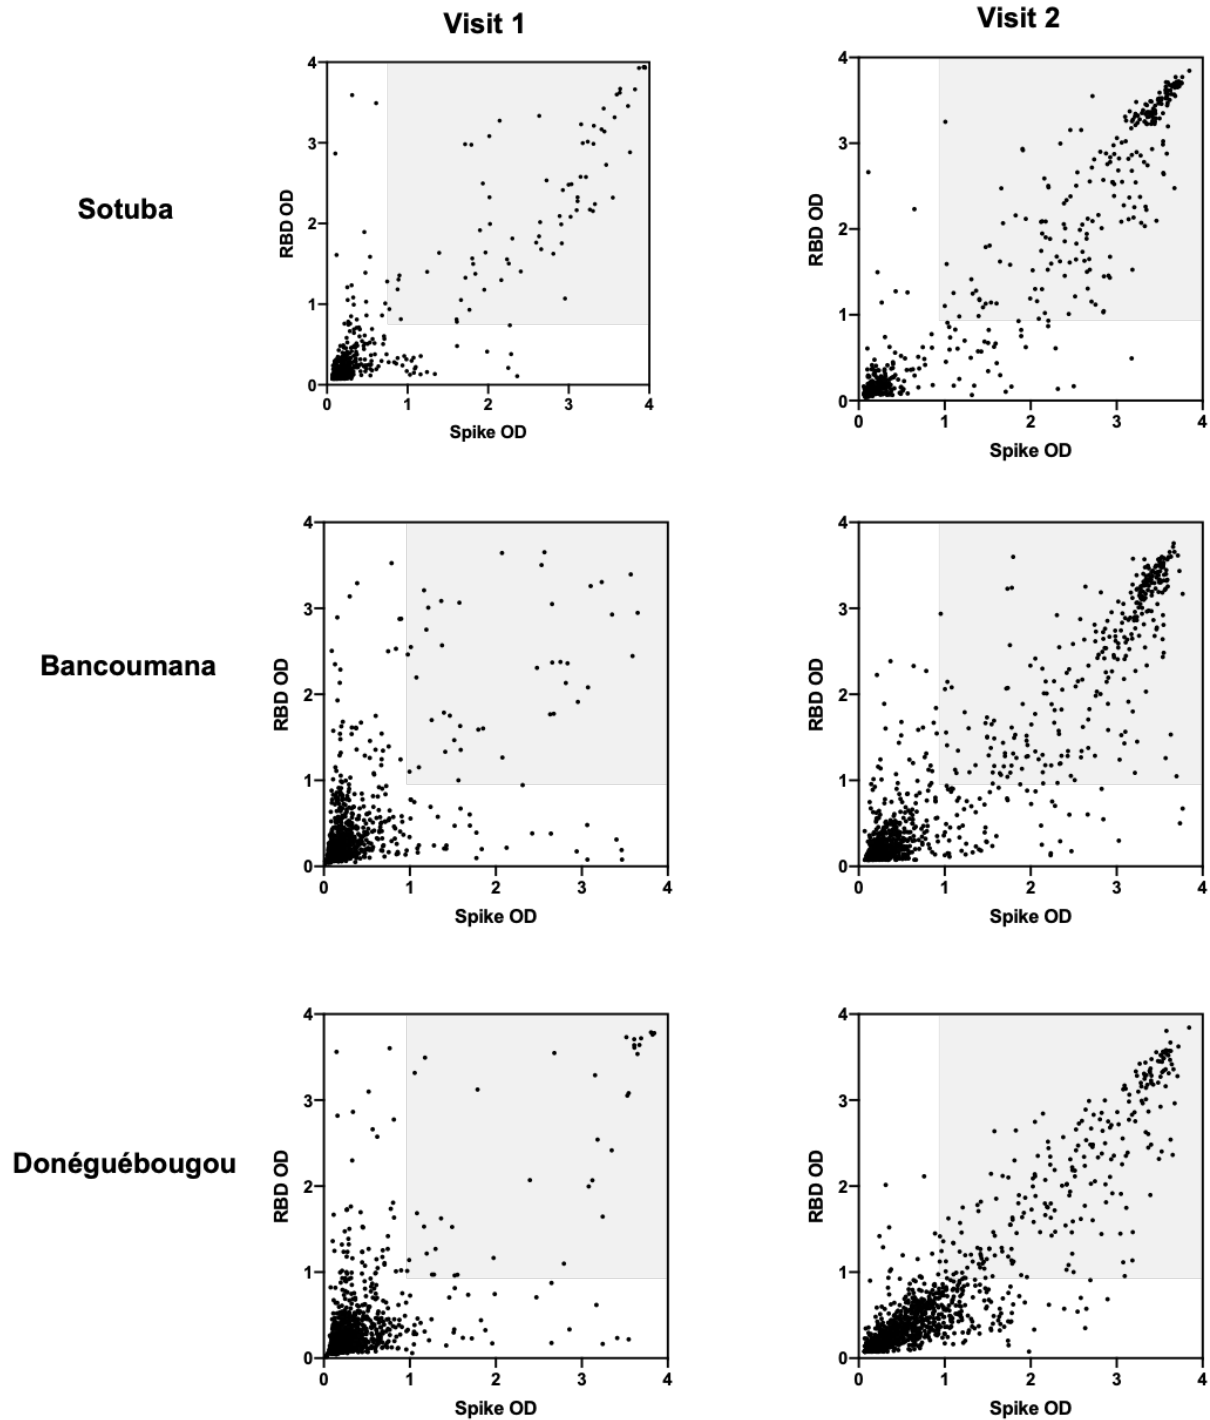

**Supplementary Figure 3: SARS-CoV-2 antibody reactivity to spike protein and RBD over time at study sites: Sotuba (top row), Bancoumana (middle row) and Donéguébougou (bottom row).**

RBD: receptor binding domain, OD: optical density

Visit 1: 28 July to 16 October 2020

Visit 2: 14 December 2020 to 29 January 2021

Shaded region represents ELISA measurements that exceed cutoffs to define seropositive cases

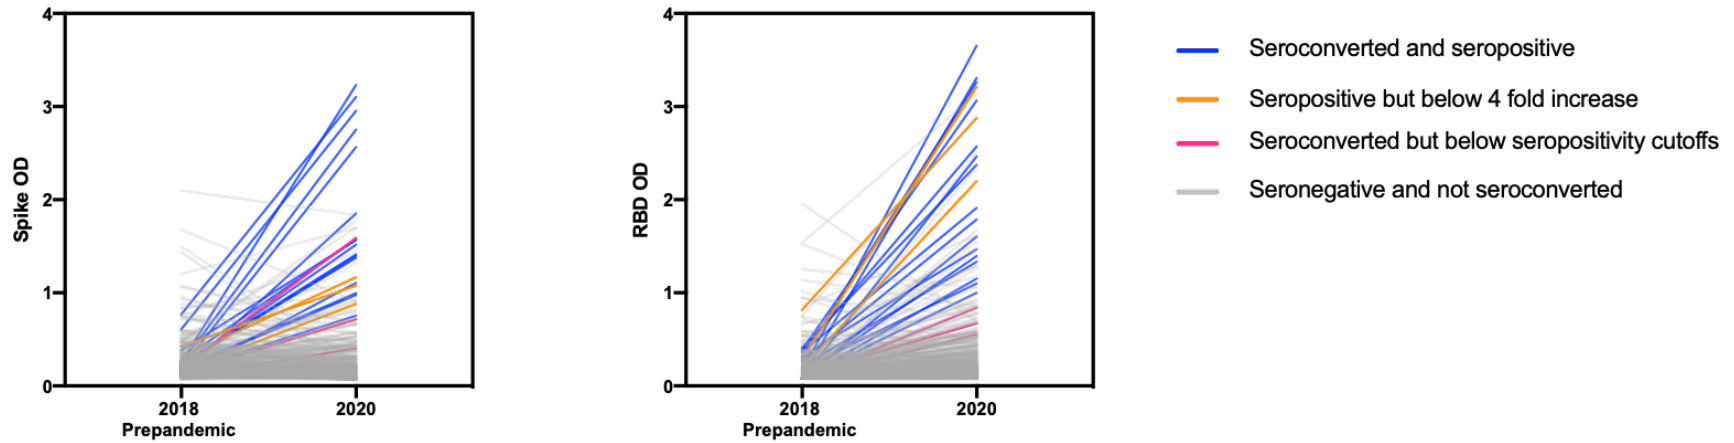

**Supplementary Figure 4: Seroconversion and seropositivity of SARS-CoV-2 antibodies to spike protein and RBD in 402 participants with pre-pandemic blood samples from Bancoumana**

RBD: receptor binding domain, OD: optical density

Seroconversion: fourfold increase in spike protein and RBD OD value from pre-pandemic sample

Seropositive: spike protein and RBD OD value above cutoff

**Supplementary Table 3: Univariate comparison of seronegative and seropositive subpopulations at visit 1 (n=2659, July/October 2020)**

|                                               | Seronegative      | Seropositive    | p-value           |
|-----------------------------------------------|-------------------|-----------------|-------------------|
| Sample size                                   | 2486              | 173             |                   |
| Co-enrolled infants                           | 13                | 0               |                   |
| <b>Demographics</b>                           |                   |                 |                   |
| Sex, male (% , n/N)                           | 50.9% (1266/2486) | 41.6% (72/173)  | <b>0.0184</b>     |
| Age, years (median, IQR)                      | 14 (8-31)         | 18 (10-36)      | <b>0.0066</b>     |
| Age group (% , n/N)                           |                   |                 |                   |
| <10 years                                     | 31.5% (783/2486)  | 24.9% (43/173)  |                   |
| 10-17 years                                   | 28.0% (696/2486)  | 23.7% (41/173)  |                   |
| >=18 years                                    | 40.5% (1007/2486) | 51.4% (89/173)  |                   |
| <b>Medical factors (% (n/N))</b>              |                   |                 |                   |
| Any comorbidity                               | 1.5% (37/2473)    | 2.9% (5/173)    | 0.1929            |
| Pregnancy (any stage)                         | 0.8% (21/2473)    | 1.2% (2/173)    | 0.6595            |
| Smoking                                       | 2.8% (66/2343)    | 2.5% (4/157)    | >0.9999           |
| Antimalarial use                              | 2.1% (52/2473)    | 3.5% (6/173)    | 0.2726            |
| BCG administration                            | 80.5% (1992/2473) | 79.8% (138/173) | 0.7668            |
| <b>Social factors</b>                         |                   |                 |                   |
| Works at healthcare facility                  | 2.8% (69/2473)    | 5.8% (10/173)   | <b>0.0352</b>     |
| Household member works at healthcare facility | 12.8% (317/2473)  | 19.7% (34/173)  | <b>0.0145</b>     |
| Household size (mean, SD)                     | 7.6 (4.2)         | 8.6 (5.4)       | <b>0.0043</b>     |
| <b>Symptoms (% , n/N)</b>                     |                   |                 |                   |
| No symptoms since onset pandemic              | 91.2% (2242/2486) | 79.2% (137/173) |                   |
| Symptoms since March 2020 (any)               | 9.8% (244/2486)   | 20.8% (36/173)  | <b>&lt;0.0001</b> |
| <b>Systemic symptoms (any)</b>                | 6.4% (159/2473)   | 14.5% (25/173)  | <b>0.0003</b>     |
| Fever                                         | 4.0% (100/2473)   | 8.7% (15/173)   | <b>0.0101</b>     |
| Chills                                        | 0.4% (9/2473)     | 1.7% (3/173)    | <b>0.0390</b>     |
| Fatigue                                       | 0.7% (17/2473)    | 1.2% (2/173)    | 0.3557            |
| Myalgia                                       | 0.7% (18/2473)    | 3.5% (6/173)    | <b>0.0036</b>     |
| Headache                                      | 3.7% (91/2473)    | 11.0% (19/173)  | <b>&lt;0.0001</b> |
| <b>Respiratory symptoms (any)</b>             | 4.5% (112/2473)   | 8.1% (14/173)   | <b>0.0413</b>     |
| Sore throat                                   | 0.4% (9/2473)     | 1.2% (2/173)    | 0.1587            |
| Cough                                         | 2.4% (59/2473)    | 4.1% (7/173)    | 0.1989            |
| Rhinorrhea                                    | 3.6% (89/2473)    | 5.2% (9/173)    | 0.2932            |
| Dyspnea                                       | 0% (0/2473)       | 0% (0/173)      | >0.9999           |
| Wheezing                                      | 0% (0/2473)       | 0% (0/173)      | >0.9999           |
| Loss of smell/taste                           | 0.2% (4/2473)     | 0.6% (1/173)    | 0.2871            |
| Other respiratory symptoms                    | <0.1% (1/2473)    | 0% (0/173)      | >0.9999           |
| <b>Gastrointestinal symptoms (any)</b>        | 2.7% (67/2473)    | 5.8% (10/173)   | <b>0.0313</b>     |
| Nausea/vomiting                               | 1.5% (37/2473)    | 2.9% (5/173)    | 0.1929            |
| Abdominal pain                                | 1.3% (31/2473)    | 2.9% (5/173)    | 0.0819            |
| Diarrhea                                      | 0.6% (16/2473)    | 0.6% (1/173)    | >0.9999           |
| <b>Symptom severity (% , n/N)<sup>1</sup></b> |                   |                 |                   |
| Missed work or school                         | 39.2% (93/237)    | 36.1% (13/36)   | 0.8547            |
| Sought medical attention                      | 49.4% (117/237)   | 33.3% (12/36)   | 0.0765            |
| Hospitalized <sup>2</sup>                     | 0.4% (1/237)      | 0% (0/36)       | >0.9999           |
| Duration of symptoms (any) (mean, SD)         | 6.4 (8.2)         | 3.6 (3.0)       | 0.1126            |
| Symptomatic at visit 1                        | 21.1% (50/237)    | 36.1% (13/36)   | 0.0564            |

<sup>1</sup>Indices of symptom severity collected in participants reporting any symptoms. Details were not collected from infants aged 6-12 months.

<sup>2</sup>Reported hospitalization: seronegative case: 8 year old female with fever, and nausea and vomiting.

**Supplementary Table 4: Univariate comparison of seronegative and new seropositive subpopulations at visit 2 (n=2353, July/October 2020 to December 2020/January 2021)**

|                                                  | Seronegative <sup>1</sup> | Seropositive <sup>2</sup> | p-value           |
|--------------------------------------------------|---------------------------|---------------------------|-------------------|
| Sample size                                      | 1629                      | 724                       |                   |
| Co-enrolled infants                              | 10                        | 0                         |                   |
| <b>Demographics</b>                              |                           |                           |                   |
| Sex, male (%, n/N)                               | 51.7% (843/1629)          | 49.6% (359/724)           | 0.3482            |
| Age, years (median, IQR)                         | 12 (7-28)                 | 18 (11-27)                | <b>&lt;0.0001</b> |
| Age group (%, n/N)                               |                           |                           |                   |
| <10 years                                        | 37.7% (614/1629)          | 18.5% (134/724)           |                   |
| 10-17 years                                      | 26.5% (432/1629)          | 30.7% (222/724)           |                   |
| >=18 years                                       | 35.8% (583/1629)          | 50.8% (368/724)           |                   |
| Days between enrollment and follow up (mean, SD) | 128.1 (13.1)              | 129.1 (19.8)              | 0.1686            |
| <b>Medical factors (% (n/N))</b>                 |                           |                           |                   |
| Any comorbidity                                  | 1.1% (17/1619)            | 2.2% (16/724)             | <b>0.0358</b>     |
| Pregnancy (any stage)                            | 0.6% (10/1629)            | 1.2% (9/724)              | 0.1361            |
| Smoking                                          | 3.2% (51/1619)            | 2.1% (15/724)             | 0.1763            |
| Antimalarial use                                 | 2.0% (32/1619)            | 1.9% (14/724)             | >0.9999           |
| BCG administration                               | 81.5% (1320/1619)         | 77.2% (559/724)           | <b>0.0159</b>     |
| <b>Social factors</b>                            |                           |                           |                   |
| Works at healthcare facility                     | 3.2% (52/1619)            | 2.2% (16/724)             | 0.2302            |
| Household member works at healthcare facility    | 11.2% (181/1619)          | 16.0% (116/724)           | <b>0.0015</b>     |
| Household size (mean, SD)                        | 7.6 (4.2)                 | 7.5 (4.3)                 | 0.8194            |
| <b>Symptoms (%, n/N)</b>                         |                           |                           |                   |
| No symptoms since visit 1                        | 50.7% (826/1629)          | 51.4% (372/724)           |                   |
| Symptoms since visit 1 (any)                     | 49.3% (803/1629)          | 48.6% (352/724)           | 0.7887            |
| <b>Systemic symptoms (any)</b>                   | 22.7% (368/1619)          | 27.8% (201/724)           | <b>0.0092</b>     |
| Fever                                            | 8.3% (134/1619)           | 9.9% (72/724)             | 0.2064            |
| Chills                                           | 2.1% (34/1619)            | 3.7% (27/724)             | <b>0.0250</b>     |
| Fatigue                                          | 2.5% (41/1619)            | 4.3% (31/724)             | <b>0.0275</b>     |
| Myalgia                                          | 2.4% (39/1619)            | 2.9% (21/724)             | 0.4817            |
| Headache                                         | 19.1% (309/1619)          | 22.7% (164/724)           | 0.0512            |
| <b>Respiratory symptoms (any)</b>                | 36.9% (598/1619)          | 32.3% (234/724)           | <b>0.0317</b>     |
| Sore throat                                      | 3.0% (48/1619)            | 2.8% (20/724)             | 0.8942            |
| Cough                                            | 21.6% (349/1619)          | 19.1% (138/724)           | 0.1860            |
| Rhinorrhea                                       | 29.7% (481/1619)          | 26.1% (189/724)           | 0.0752            |
| Dyspnea                                          | 0.2% (4/1619)             | 0.3% (2/724)              | >0.9999           |
| Wheezing                                         | 0% (0/1619)               | 0% (0/724)                | >0.9999           |
| Loss of smell/taste                              | 1.3% (21/1619)            | 2.2% (16/724)             | 0.1083            |
| Other respiratory symptoms                       | 0.4% (6/1619)             | 0.1% (1/724)              | 0.4480            |
| <b>Gastrointestinal symptoms (any)</b>           | 5.6% (90/1619)            | 7.0% (51/724)             | 0.1878            |
| Nausea/vomiting                                  | 2.3% (38/1619)            | 3.7% (27/724)             | 0.0758            |
| Abdominal pain                                   | 3.5% (56/1619)            | 5.0% (36/724)             | 0.0850            |
| Diarrhea                                         | 1.1% (17/1619)            | 0.7% (5/724)              | 0.4927            |
| <b>Symptom severity (%, n/N)<sup>3</sup></b>     |                           |                           |                   |
| Missed work or school                            | 12.5% (100/797)           | 15.6% (55/352)            | 0.1611            |
| Sought medical attention                         | 45.9% (366/797)           | 63.4% (223/352)           | <b>&lt;0.0001</b> |
| Hospitalized <sup>4</sup>                        | 0.3% (2/797)              | 0.9% (3/352)              | 0.1711            |
| Duration of symptoms (any) (mean, SD)            | 4.5 (6.2)                 | 4.4 (3.1)                 | 0.190             |
| Symptomatic at visit 2                           | 38.3% (305/797)           | 32.1% (113/352)           | <b>0.0463</b>     |

<sup>1</sup>Seronegative refers to seronegative individuals at visit 1 and visit 2



<sup>2</sup>Seropositive refers to new seropositive individuals at visit 2 (seronegative at visit 1)

<sup>3</sup>Indices of symptom severity collected in participants reporting any symptoms. Details were not collected from infants aged 6-12 months.

<sup>4</sup>Reported hospitalizations: seronegative cases: 22 year old female with fever, headache, nausea and vomiting, and abdominal pain, 14 year old male with cough. Seropositive cases: 2 year old male with fever, cough and rhinorrhea, 12 year old male with headache, and 30 year old male with fever, headache and rhinorrhea.

**Supplementary Table 5: Longitudinal assessment of participants seropositive at visit 1 (n=157, July/October 2020 to December 2021/January 2021)**

|                                                                    | <b>Sotuba</b>             | <b>Bancoumana</b>          | <b>Donéguébougou</b>      | <b>Overall</b>            |
|--------------------------------------------------------------------|---------------------------|----------------------------|---------------------------|---------------------------|
| Sample size                                                        | 66                        | 46                         | 45                        | 157                       |
| Serostable (% <sup>1</sup> , n/N)<br>(Seropositive/Seropositive)   | 83.3% (55/66)             | 67.4% (31/46)              | 64.4% (29/45)             | 73.2% (115/157)           |
| Seroreverted (% <sup>1</sup> , n/N)<br>(Seropositive/Seronegative) | 16.7% (11/66)             | 32.6% (15/46)              | 35.6% (16/45)             | 26.8% (42/157)            |
| Spike OD at enrollment<br>(mean, SD)                               | 2.73 (0.871)              | 1.92 (0.90)                | 2.23 (1.17)               | 2.35 (1.03)               |
| RBD OD at enrollment<br>(mean, SD)                                 | 2.35 (0.91)               | 2.29 (0.82)                | 2.30 (1.11)               | 2.32 (0.94)               |
| Days between enrollment<br>and follow up (mean, SD)                | 139.4 (14.2)              | 123.4 (11.5)               | 128.6 (11.8)              | 131.6 (14.5)              |
| Rate of change Spike OD<br>(OD/100 days) (mean, 95%<br>CI)         | -0.11<br>(-0.32 to 0.10)  | -0.03<br>(-0.319 to 0.259) | -0.15<br>(-0.34 to 0.04)  | -0.10<br>(-0.23 to 0.03)  |
| Rate of change RBD OD<br>(OD/100 days) (mean, 95%<br>CI)           | -0.26<br>(-0.48 to -0.04) | -0.66<br>(-0.87 to -0.45)  | -0.60<br>(-0.82 to -0.38) | -0.47<br>(-0.60 to -0.34) |

**Supplementary Table 6: Univariate comparison of serostatus at visit 2 in participants seropositive at visit 1 (n=157, July/October 2020 to December 2021/January 2021)**

|                                                  | Seropositive <sup>1</sup> | Seronegative <sup>2</sup> | p-value       |
|--------------------------------------------------|---------------------------|---------------------------|---------------|
| Sample size                                      | 115                       | 42                        |               |
| Co-enrolled infants                              | 0                         | 0                         |               |
| <b>Demographics</b>                              |                           |                           |               |
| Sex, male (%, n/N)                               | 36.5% (42/115)            | 54.8% (19/42)             | <b>0.0456</b> |
| Age, years (median, IQR)                         | 20 (10-39.5)              | 11.5 (8-28)               | 0.0691        |
| Age group (%, n/N)                               |                           |                           |               |
| <10 years                                        | 21.7% (25/115)            | 33.3% (14/42)             |               |
| 10-17 years                                      | 20.9% (24/115)            | 30.9% (13/42)             |               |
| >=18 years                                       | 57.4% (66/115)            | 35.7% (15/42)             |               |
| Days between enrollment and follow up (mean, SD) | 132.4 (14.9)              | 129.3 (13.2)              | 0.2287        |
| <b>Medical factors (% (n/N))</b>                 |                           |                           |               |
| Any comorbidity                                  | 2.6% (3/115)              | 0% (0/42)                 | 0.5641        |
| Pregnancy (any stage)                            | 1.7% (2/115)              | 0% (0/42)                 | >0.9999       |
| Smoking                                          | 1.7% (2/115)              | 4.8% (2/42)               | 0.2905        |
| Antimalarial use                                 | 3.5% (4/115)              | 2.4% (1/42)               | >0.9999       |
| BCG administration                               | 80.9% (93/115)            | 81.0% (34/42)             | >0.9999       |
| <b>Social factors</b>                            |                           |                           |               |
| Works in healthcare                              | 5.2% (6/115)              | 7.1% (3/42)               | 0.7017        |
| Household member works in healthcare             | 19.1% (22/115)            | 19.0% (8/42)              | >0.9999       |
| Household size (mean, SD)                        | 9.1 (6.1)                 | 7.1 (3.3)                 | <b>0.0495</b> |
| <b>Symptoms (%, n/N)</b>                         |                           |                           |               |
| No symptoms since visit 1                        | 49.1% (68/115)            | 54.8% (23/42)             |               |
| Symptoms since visit 1                           | 40.9% (47/115)            | 45.2% (19/42)             | 0.7155        |
| <b>Systemic symptoms</b>                         |                           |                           |               |
|                                                  | 23.5% (27/115)            | 28.6% (12/42)             | 0.5354        |
| Fever                                            | 11.3% (13/115)            | 9.5% (4/42)               | >0.9999       |
| Chills                                           | 4.3% (5/115)              | 2.4% (1/42)               | >0.9999       |
| Fatigue                                          | 7.0% (8/115)              | 9.5% (4/42)               | 0.7347        |
| Myalgia                                          | 7.0% (8/115)              | 2.4% (1/42)               | 0.4462        |
| Headache                                         | 20.9% (24/115)            | 21.4% (9/42)              | >0.9999       |
| <b>Respiratory symptoms</b>                      |                           |                           |               |
|                                                  | 31.3% (36/79)             | 26.2% (11/42)             | 0.6941        |
| Sore throat                                      | 5.2% (6/115)              | 2.4% (1/42)               | 0.6756        |
| Cough                                            | 18.3% (21/115)            | 14.3% (6/42)              | 0.6397        |
| Rhinorrhea                                       | 23.5% (27/115)            | 21.4% (9/42)              | 0.8340        |
| Dyspnea                                          | 0% (0/115)                | 2.4% (1/42)               | 0.2675        |
| Wheezing                                         | 0% (0/115)                | 0% (0/42)                 | >0.9999       |
| Loss of smell/taste                              | 3.5% (4/115)              | 4.8% (2/42)               | 0.5743        |
| Other respiratory symptoms                       | 0% (0/115)                | 0% (0/42)                 | >0.9999       |
| <b>Gastrointestinal symptoms</b>                 |                           |                           |               |
|                                                  | 9.6% (11/115)             | 7.1% (3/42)               | 0.7610        |
| Nausea/vomiting                                  | 5.2% (6/115)              | 2.4% (1/42)               | 0.6756        |
| Abdominal pain                                   | 5.2% (6/115)              | 7.1% (3/42)               | 0.7017        |
| Diarrhea                                         | 0.9% (1/115)              | 0% (0/42)                 | >0.9999       |
| <b>Symptom severity</b>                          |                           |                           |               |
| Missed work or school                            | 23.4% (11/47)             | 15.8% (3/19)              | 0.7407        |
| Sought medical attention                         | 57.4% (27/47)             | 63.2% (12/19)             | 0.7849        |
| Hospitalized                                     | 0% (0/47)                 | 0% (0/19)                 | >0.9999       |
| Duration of symptoms (any) (mean, SD)            | 4.9 (5.4)                 | 2.8 (1.9)                 | 0.1870        |
| Symptomatic at Visit 2                           | 29.8% (14/47)             | 36.8% (7/19)              | 0.5748        |

<sup>1</sup>Seropositive refers to participants seropositive at visit 1 and serostable at visit 2

<sup>2</sup>Seronegative refers to participants seropositive at visit 1 and seronegative at visit 2.

**Supplementary Table 7: Adverse events according to serostatus between visit 1 (July/August 2020) and visit 2 (December 2020/January 2021) in individuals co-enrolled in a clinical trial at the Bancoumana site (n=146)**

|                                            | Seronegative <sup>1</sup> | Seropositive <sup>2</sup> | p-value       |
|--------------------------------------------|---------------------------|---------------------------|---------------|
| Sample size                                | 85                        | 61                        |               |
| <b>Adverse event (% , n/N)</b>             |                           |                           |               |
| <b>Clinical, possibly COVID-19 related</b> |                           |                           |               |
| Abdominal pain                             | 1.2% (1/85)               | 1.6% (1/61)               | >0.9999       |
| Bronchitis                                 | 3.5% (3/85)               | 1.6% (1/61)               | 0.6403        |
| Cough                                      | 1.2% (1/85)               | 3.3% (2/61)               | 0.5714        |
| Chills                                     | 0% (0/85)                 | 1.6% (1/61)               | 0.4218        |
| Decreased appetite                         | 0% (0/85)                 | 1.6% (1/61)               | 0.4218        |
| Enteritis                                  | 0% (0/85)                 | 1.6% (1/61)               | 0.4178        |
| Gastroenteritis                            | 2.4% (2/85)               | 0% (0/61)                 | 0.5102        |
| Headache                                   | 15.3% (13/85)             | 11.5% (7/61)              | 0.6280        |
| Influenza (clinical)                       | 2.4% (2/85)               | 3.3% (2/61)               | >0.9999       |
| Nausea                                     | 1.2% (1/85)               | 0% (0/61)                 | >0.9999       |
| Paronychia                                 | 1.2% (1/85)               | 0% (0/61)                 | >0.9999       |
| Pyrexia                                    | 0% (0/85)                 | 1.6% (1/61)               | 0.4296        |
| Rhinitis                                   | 23.5% (20/85)             | 34.4% (21/61)             | 0.2619        |
| Sinobronchitis                             | 3.5% (3/85)               | 3.3% (2/61)               | >0.9999       |
|                                            |                           |                           |               |
| <b>Clinical, other</b>                     |                           |                           |               |
| Back pain                                  | 0% (0/85)                 | 1.6% (1/61)               | 0.4218        |
| Conjunctivitis                             | 9.4% (8/81)               | 3.3% (2/61)               | 0.1938        |
| Dental caries                              | 9.4% (8/85)               | 0% (0/61)                 | 0.0209        |
| Dermatosis                                 | 1.2% (1/85)               | 0% (0/61)                 | >0.9999       |
| Dizziness                                  | 1.2% (1/85)               | 0% (0/61)                 | >0.9999       |
| Ear infection                              | 0% (0/85)                 | 1.6% (1/61)               | 0.4178        |
| Ecchymosis                                 | 0% (0/85)                 | 1.6% (1/61)               | 0.4178        |
| Eye burns                                  | 1.2% (1/85)               | 0% (0/61)                 | >0.9999       |
| Food poisoning                             | 1.2% (1/85)               | 1.6% (1/61)               | >0.9999       |
| Gastritis                                  | 2.4% (2/85)               | 6.6% (4/61)               | 0.2361        |
| Genitourinary tract infection              | 2.4% (2/85)               | 3.3% (2/61)               | >0.9999       |
| Hemorrhoids                                | 1.2% (1/85)               | 0% (0/61)                 | >0.9999       |
| Hypertension                               | 1.2% (1/85)               | 0% (0/61)                 | >0.9999       |
| Malaria                                    | 29.4% (25/85)             | 32.8% (20/61)             | 0.7179        |
| Oropharyngeal pain                         | 1.2% (1/85)               | 0% (0/61)                 | >0.9999       |
| Pain                                       | 0% (0/85)                 | 8.2% (5/61)               | <b>0.0139</b> |
| Strangulated umbilical hernia              | 1.2% (1/85)               | 0% (0/61)                 | >0.9999       |
| Tonsillitis                                | 0% (0/85)                 | 1.6% (1/61)               | 0.4207        |
| Typhoid fever                              | 2.4% (2/81)               | 3.3% (2/61)               | >0.9999       |
| Urticaria                                  | 1.2% (1/85)               | 0% (0/61)                 | >0.9999       |
| Wound                                      | 4.7% (8/84)               | 8.2% (5/61)               | 0.4913        |
|                                            |                           |                           |               |
| <b>Laboratory</b>                          |                           |                           |               |
| Alanine aminotransferase increased         | 1.2% (1/85)               | 0% (0/61)                 | >0.9999       |
| Blood creatinine increased                 | 4.7% (4/85)               | 1.6% (1/61)               | 0.0836        |
| Hemoglobin decreased                       | 0% (0/85)                 | 0% (0/61)                 | >0.9999       |
| Leukopenia                                 | 4.7% (4/85)               | 9.8% (6/61)               | 0.2020        |
| Neutropenia                                | 5.9% (5/85)               | 11.5% (7/61)              | 0.2397        |
| Thrombocytopenia                           | 0% (0/85)                 | 3.3% (2/61)               | 0.1729        |
| White blood cell count increased           | 1.2% (1/85)               | 0% (0/61)                 | >0.9999       |

<sup>1</sup>Seronegative refers to seronegative individuals at visit 1 and visit 2

<sup>2</sup>Seropositive refers to new seropositive individuals at visit 2 (seronegative at visit 1)

**Supplementary Table 8: Grading of commonly reported adverse events in individuals co-enrolled in a clinical trial at the Bancoumana site (n=146)**

|                               | Seronegative <sup>1</sup> | Seropositive <sup>2</sup> |
|-------------------------------|---------------------------|---------------------------|
| Sample size                   | 85                        | 61                        |
| <b>Adverse event (%, n/N)</b> |                           |                           |
| Headache                      | 15.3% (13/85)             | 11.5% (7/61)              |
| Grade 1                       | 15.4% (2/13)              | 14.3% (1/7 )              |
| Grade 2                       | 84.6% (11/13)             | 85.7% (6/7)               |
| Grade 3                       | 0% (0/13)                 | 0% (0/7)                  |
| Rhinitis                      | 23.5% (20/85)             | 34.4% (21/61)             |
| Grade 1                       | 5.0% (1/20)               | 0% (0/21)                 |
| Grade 2                       | 95.0% (19/20)             | 100% (21/21)              |
| Grade 3                       | 0% (0/20)                 | 0% (0/21)                 |
| Malaria                       | 29.4% (25/85)             | 32.8% (20/61)             |
| Grade 1                       | 0% (0/25)                 | 0% (0/20)                 |
| Grade 2                       | 96.0% (24/25)             | 100% (20/20)              |
| Grade 3                       | 4.0% (1/25)               | 0% (0/20)                 |

<sup>1</sup>Seronegative refers to seronegative individuals at visit 1 and visit 2

<sup>2</sup>Seropositive refers to new seropositive individuals at visit 2 (seronegative at visit 1)

**Supplementary Table 9: Adverse events according to serostatus between visit 1 (July/August 2020) and visit 2 (December 2020/January 2021) in individuals co-enrolled in a clinical trial at the Donéguébougou site (n=1037)**

|                                               | Seronegative <sup>1</sup> | Seropositive <sup>2</sup> | p-value       |
|-----------------------------------------------|---------------------------|---------------------------|---------------|
| Sample size                                   | 785                       | 252                       |               |
| <b>Adverse event (% , n/N)</b>                |                           |                           |               |
| <b>Clinical, potentially COVID-19 related</b> |                           |                           |               |
| Abdominal pain                                | 3.1% (24/785)             | 3.6% (9/252)              | 0.6817        |
| Arthralgia                                    | 0.5% (4/785)              | 0% (0/252)                | 0.5775        |
| Bronchitis                                    | 2.3% (18/785)             | 3.2% (8/252)              | 0.4866        |
| Chills                                        | 0.4% (3/785)              | 0.4% (1/252)              | >0.9999       |
| Cough                                         | 0.4% (3/785)              | 0.8% (2/252)              | 0.6002        |
| Decreased appetite                            | 0.8% (6/785)              | 1.2% (3/252)              | 0.4604        |
| Diarrhoea                                     | 0.1% (1/785)              | 0% (0/252)                | >0.9999       |
| Gastroenteritis                               | 1.4% (11/785)             | 2.4% (6/252)              | 0.2675        |
| Headache                                      | 9.4% (74/785)             | 18.3% (46/252)            | <b>0.0003</b> |
| Myalgia                                       | 0.6% (5/785)              | 0% (0/252)                | 0.3436        |
| Nasopharyngitis                               | 1.5% (12/785)             | 2.4% (6/252)              | 0.4053        |
| Nausea                                        | 0% (0/785)                | 0.4% (1/252)              | 0.2430        |
| Oropharyngeal pain                            | 0.4% (3/785)              | 0% (0/252)                | >0.9999       |
| Pharyngitis                                   | 10.7% (84/785)            | 7.1% (18/252)             | 0.1138        |
| Pneumonia                                     | 0.3% (2/785)              | 0% (0/252)                | >0.9999       |
| Pyrexia                                       | 1.9% (15/785)             | 3.6% (9/252)              | 0.1474        |
| Rhinitis                                      | 25.1% (197/785)           | 33.3% (84/252)            | <b>0.0116</b> |
| Rhinorrhoea                                   | 0.1% (1/785)              | 0% (0/252)                | >0.9999       |
| Sinobronchitis                                | 1.5% (12/785)             | 0.4% (1/252)              | 0.2069        |
| Vomiting                                      | 0.6% (5/785)              | 0% (0/252)                | 0.3436        |
|                                               |                           |                           |               |
| <b>Clinical, other</b>                        |                           |                           |               |
| Abscess                                       | 0.1% (1/785)              | 0% (0/252)                | >0.9999       |
| Abscess limb                                  | 0.1% (1/785)              | 0% (0/252)                | >0.9999       |
| Arthropod sting                               | 0.1% (1/785)              | 0.4% (1/252)              | 0.4271        |
| Asthenia                                      | 0.6% (5/785)              | 0.8% (2/252)              | 0.6795        |
| Back pain                                     | 0.1% (1/785)              | 0% (0/252)                | >0.9999       |
| Chest pain                                    | 0.1% (1/785)              | 0% (0/252)                | >0.9999       |
| Conjunctivitis                                | 0.3% (2/785)              | 0.4% (1/252)              | 0.5666        |
| Dental caries                                 | 1.1% (9/785)              | 3.2% (8/252)              | <b>0.0416</b> |
| Dermatosis                                    | 0.1% (1/785)              | 0% (0/252)                | >0.9999       |
| Dizziness                                     | 0.8% (6/785)              | 1.6% (4/252)              | 0.2681        |
| Dysentery                                     | 0.4% (3/785)              | 0.8% (2/252)              | 0.6002        |
| Dysmenorrhoea                                 | 0% (0/785)                | 0.4% (1/252)              | 0.2430        |
| Ear infection                                 | 0.1% (1/785)              | 0% (0/252)                | >0.9999       |
| Epistaxis                                     | 0.1% (1/785)              | 0% (0/252)                | >0.9999       |
| Food poisoning                                | 0.1% (1/785)              | 0% (0/252)                | >0.9999       |
| Fungal skin infection                         | 0.1% (1/785)              | 0% (0/252)                | >0.9999       |
| Furuncle                                      | 0.1% (1/785)              | 0.4% (1/252)              | 0.4271        |
| Gastritis                                     | 0.1% (1/785)              | 1.2% (3/252)              | <b>0.0466</b> |
| Genital infection                             | 0.1% (1/785)              | 0% (0/252)                | >0.9999       |
| Gingivitis                                    | 0.1% (1/785)              | 0% (0/252)                | >0.9999       |
| Hordeolum                                     | 0.1% (1/785)              | 0% (0/252)                | >0.9999       |
| Hypertension                                  | 0.1% (1/785)              | 0% (0/252)                | >0.9999       |
| Infection parasitic                           | 0.1% (1/785)              | 0% (0/252)                | >0.9999       |
| Injection site pain                           | 3.8% (30/785)             | 4.8% (12/252)             | 0.5812        |
| Ligament sprain                               | 0.1% (1/785)              | 0% (0/252)                | >0.9999       |
| Limb injury                                   | 0.4% (3/785)              | 0.4% (1/252)              | >0.9999       |

|                                    |                 |                 |         |
|------------------------------------|-----------------|-----------------|---------|
| Malaria                            | 41.1% (323/785) | 41.7% (105/252) | 0.8834  |
| Mastitis                           | 0.1% (1/785)    | 0.4% (1/252)    | 0.4271  |
| Otitis externa                     | 0.3% (2/785)    | 0.4% (1/252)    | 0.5666  |
| Otitis media                       | 0.3% (2/785)    | 0.4% (1/252)    | 0.5666  |
| Pain                               | 0.3% (2/785)    | 0% (0/252)      | >0.9999 |
| Pruritus                           | 0% (0/785)      | 0.4% (1/252)    | 0.2430  |
| Sciatica                           | 0.3% (2/785)    | 0% (0/252)      | >0.9999 |
| Snake bite                         | 0.1% (1/785)    | 0% (0/252)      | >0.9999 |
| Tachycardia                        | 0.3% (2/785)    | 0% (0/252)      | >0.9999 |
| Thermal burn                       | 0.1% (1/785)    | 0% (0/252)      | >0.9999 |
| Tonsillitis                        | 0.3% (2/785)    | 0.4% (1/252)    | 0.5666  |
| Urinary tract infection            | 0.5% (4/785)    | 0.8% (2/252)    | 0.6369  |
| Urticaria                          | 0.3% (2/785)    | 0.8% (2/252)    | 0.2498  |
| Wound                              | 1.3% (10/785)   | 1.2% (3/252)    | >0.9999 |
| Wound infection                    | 0.4% (3/785)    | 0.8% (2/252)    | 0.6002  |
|                                    |                 |                 |         |
| <b>Laboratory</b>                  |                 |                 |         |
| Alanine aminotransferase increased | 0.8% (6/785)    | 1.6% (4/252)    | >0.9999 |
| Blood creatinine increased         | 0.8% (6/785)    | 1.2% (3/252)    | 0.4604  |
| Hemoglobin decreased               | 0.3% (2/785)    | 1.2% (3/252)    | 0.0958  |
| Leukocytosis                       | 0.5% (4/785)    | 0.8% (2/252)    | 0.6369  |
| Leukopenia                         | 5.6% (44/785)   | 7.1% (18/252)   | 0.3624  |
| Neutropenia                        | 6.8% (53/785)   | 7.9% (20/252)   | 0.5712  |
| Thrombocytopenia                   | 0.6% (5/785)    | 1.6% (4/252)    | 0.2327  |

<sup>1</sup>Seronegative refers to seronegative individuals at visit 1 and visit 2

<sup>2</sup>Seropositive refers to new seropositive individuals at visit 2 (seronegative at visit 1)

**Supplementary Table 10: Grading of commonly reported adverse events in individuals co-enrolled in a clinical trial at the Donéguebougou site (n=1037)**

|                                | Seronegative <sup>1</sup> | Seropositive <sup>2</sup> |
|--------------------------------|---------------------------|---------------------------|
| Sample size                    | 85                        | 61                        |
| <b>Adverse event (% , n/N)</b> |                           |                           |
| Headache                       | 9.4% (74/785)             | 18.3% (46/252)            |
| Grade 1                        | 98.6% (73/74)             | 97.8% (45/46)             |
| Grade 2                        | 1.4% (1/74)               | 2.2% (1/46)               |
| Grade 3                        | 0% (0/74)                 | 0% (0/46)                 |
|                                |                           |                           |
| Rhinitis                       | 25.1% (197/785)           | 33.3% (84/252)            |
| Grade 1                        | 91.4% (180/197)           | 90.5% (76/84)             |
| Grade 2                        | 7.1% (14/197)             | 9.5% (8/84)               |
| Grade 3                        | 1.5% (3/197)              | 0% (0/84)                 |
|                                |                           |                           |
| Malaria                        | 41.1% (323/785)           | 41.7% (105/252)           |
| Grade 1                        | 77.1% (249/323)           | 78.1% (82/105)            |
| Grade 2                        | 17.6% (57/323)            | 17.1% (18/105)            |
| Grade 3                        | 5.3% (17/323)             | 4.8% (5/105)              |

<sup>1</sup>Seronegative refers to seronegative individuals at visit 1 and visit 2

<sup>2</sup>Seropositive refers to new seropositive individuals at visit 2 (seronegative at visit 1)
